# Supplementary material for: Defective NOD2 peptidoglycan sensing promotes diet-induced inflammation, dysbiosis, and insulin resistance
Source: PubMed Central journal article supplement (PMC4364944; doi:10.15252/emmm.201404169), 2015-02-09
Supplement: emmm0007-0259-sd2.pdf [file emmm0007-0259-sd2.pdf]

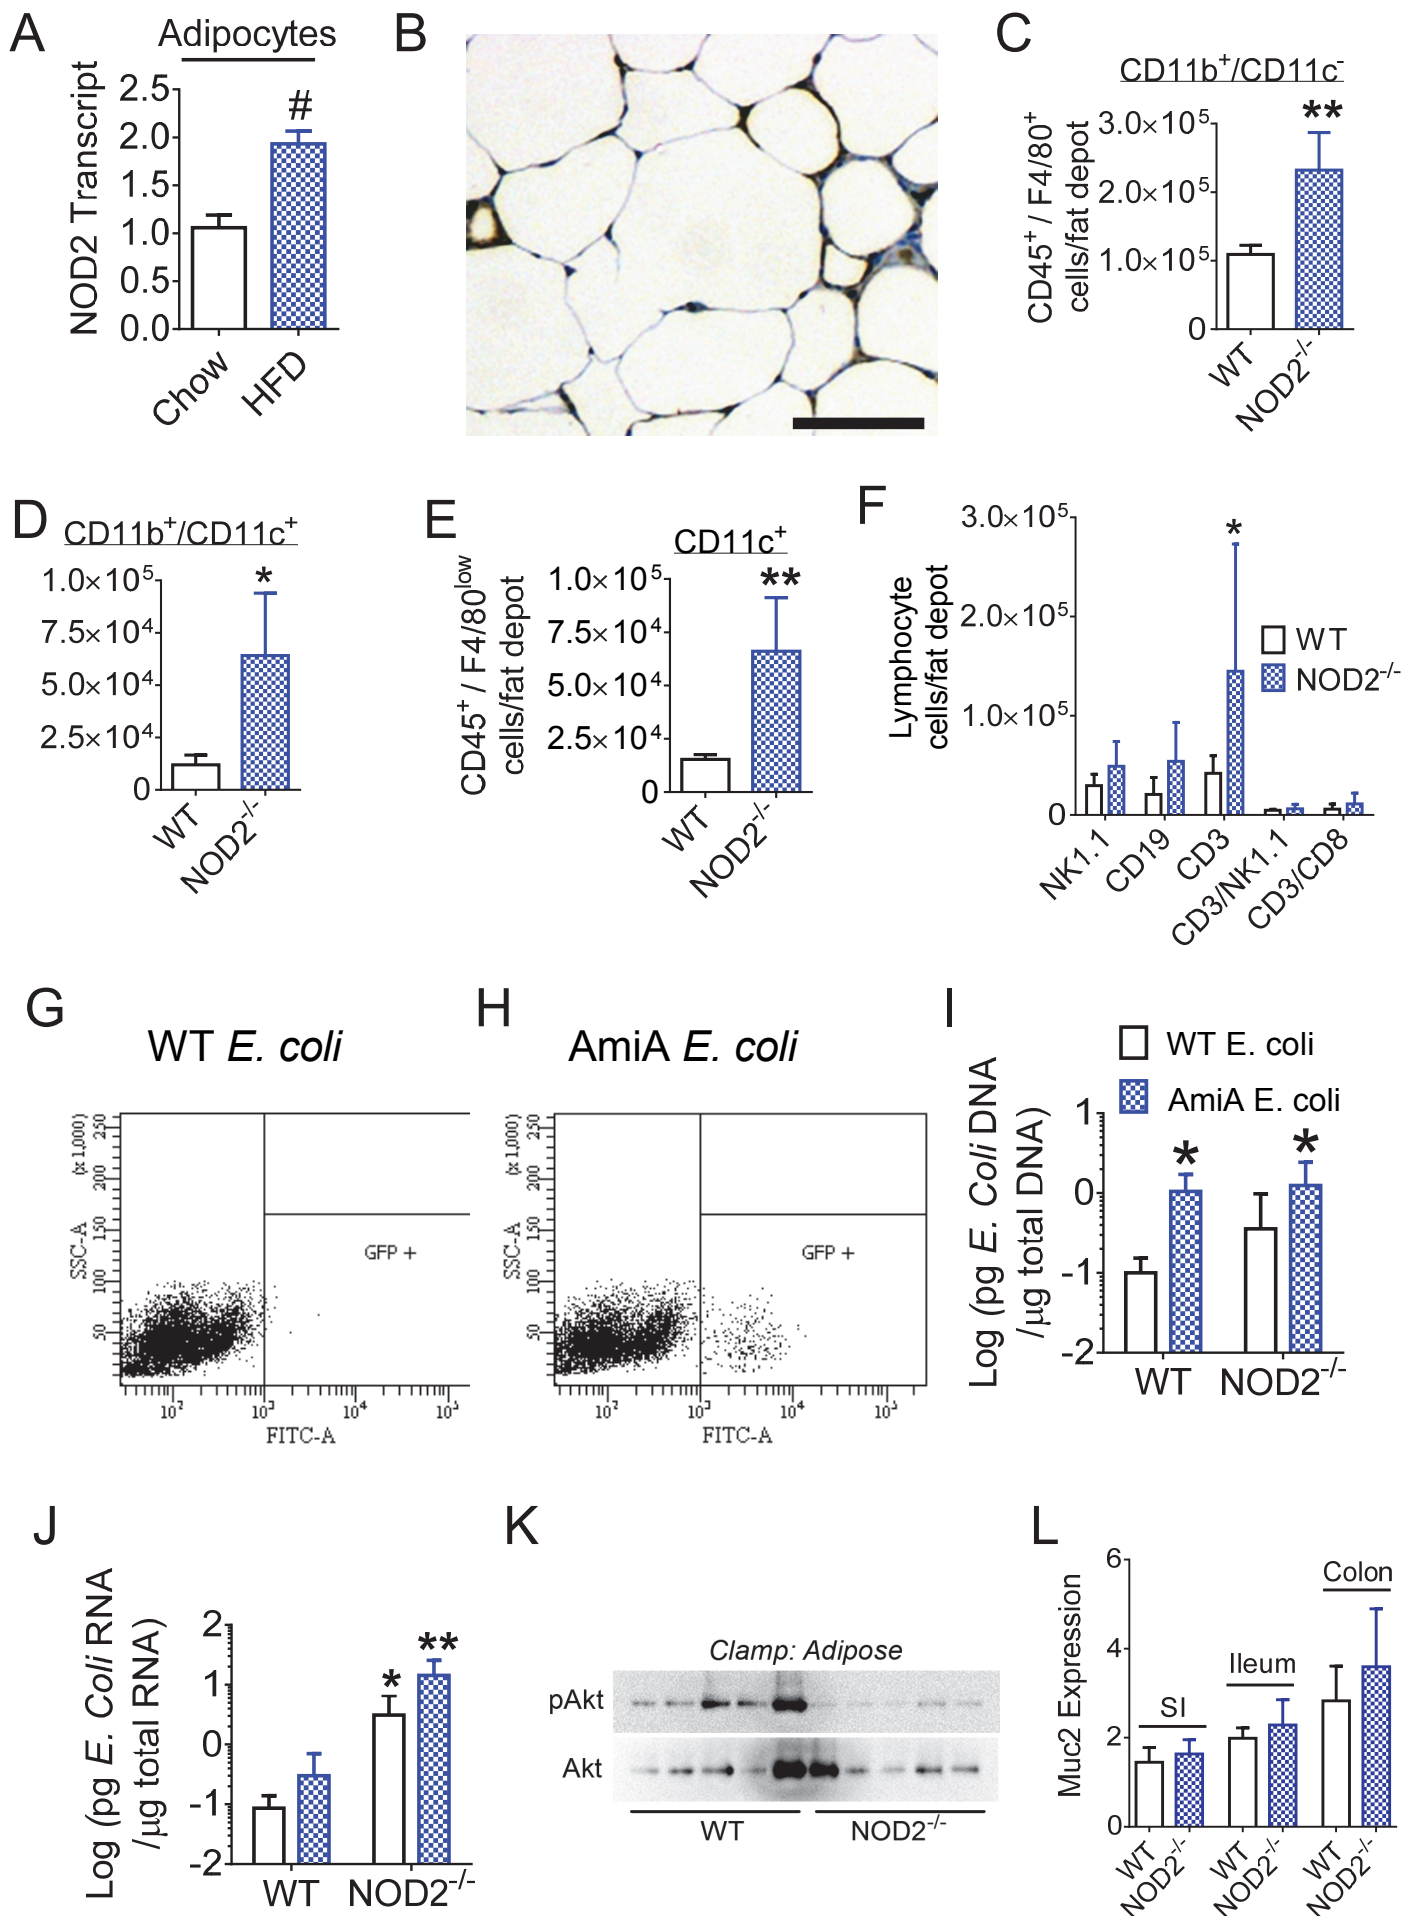

Fig S2
